# Supplementary material for: Phase I/II Study of the Mesothelin-targeted Immunotoxin LMB-100 with Nab-Paclitaxel for Patients with Advanced Pancreatic Adenocarcinoma
Source: Oxford University Press journal article supplement (doi:10.1158/1078-0432.ccr-19-2586), 2019-12-02
Supplement: 10780432ccr192586-sup-226887_2_supp_5864074_q03s07.pdf [file 10780432ccr192586-sup-226887_2_supp_5864074_q03s07.pdf]

## Supplemental Figure 3. Severe AEs unrelated to research

| Adverse Event          | Patient |         |         |
|------------------------|---------|---------|---------|
|                        | #03     | #05     | #17     |
| abdominal infection    |         | grade 5 |         |
| ALKP increased         | grade 3 |         |         |
| anemia                 | grade 3 |         |         |
| aspiration             |         | grade 4 |         |
| AST increased          |         | grade 4 |         |
| colonic perforation    |         | grade 5 |         |
| dehydration            | grade 3 |         |         |
| fever                  | grade 3 |         |         |
| hyperuricemia          |         | grade 3 |         |
| hyponatremia           | grade 3 |         |         |
| hypophosphatemia       | grade 3 |         |         |
| hypotension            | grade 3 |         |         |
| hypoxia                |         |         | grade 3 |
| lung infection         | grade 3 |         |         |
| respiratory failure    |         | grade 4 |         |
| sepsis                 | grade 3 | grade 5 |         |
| sinus tachycardia      |         | grade 3 |         |
| urine output decreased |         | grade 4 |         |

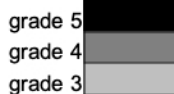

**Patient #03** developed 3 episodes of rapidly resolving, culture negative, non-neutropenic sepsis with hypotension. The patient was later diagnosed with adrenal insufficiency, presumably due to immediately prior immune checkpoint inhibitor therapy.

**Patient #05** received therapeutic paracentesis for ascites just prior to study enrollment. The patient developed an acute abdomen on Cycle 1 Day 12 and was found to have fecund peritoneal fluid on diagnostic paracentesis. Due to worsening sepsis despite antibiotic treatment, care was withdrawn per patient directive.

**Patient #17** developed a respiratory infection requiring hospitalization.
