# Supplementary material for: Phase I/II Study of the Mesothelin-targeted Immunotoxin LMB-100 with Nab-Paclitaxel for Patients with Advanced Pancreatic Adenocarcinoma
Source: Oxford University Press journal article supplement (doi:10.1158/1078-0432.ccr-19-2586), 2019-12-02
Supplement: 10780432ccr192586-sup-226887_2_supp_5864075_q03s07.pdf [file 10780432ccr192586-sup-226887_2_supp_5864075_q03s07.pdf]

**Supplemental Figure 2. AEs attributed to nab-paclitaxel**

No. of persons with AE attributed to Nab-paclitaxel

0 2 4 6 8 10 12 14 16 18 20

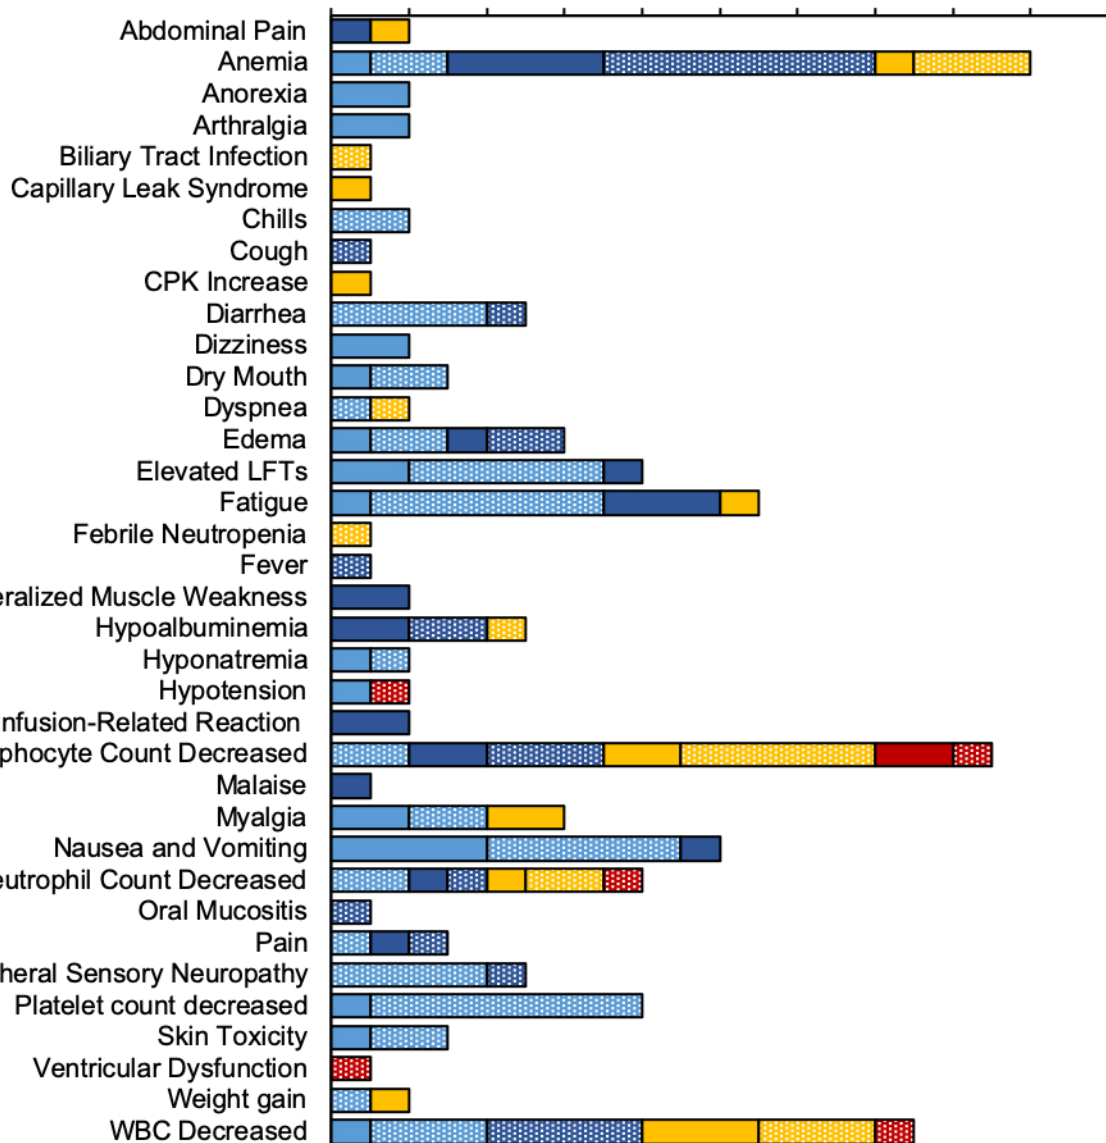

■ Grade 1 (DL 1)   
 ■ Grade 1 (DL-1)   
 ■ Grade 2 (DL 1)   
 ■ Grade 2 (DL-1)

■ Grade 3 (DL 1)   
 ■ Grade 3 (DL -1)   
 ■ Grade 4 (DL 1)   
 ■ Grade 4 (DL -1)
