# Supplementary figures and images for: Phase I/II Study of the Mesothelin-targeted Immunotoxin LMB-100 with Nab-Paclitaxel for Patients with Advanced Pancreatic Adenocarcinoma
Source: Oxford University Press journal article supplement (doi:10.1158/1078-0432.ccr-19-2586), 2019-12-02

## Supplemental Figure 1. Study Design

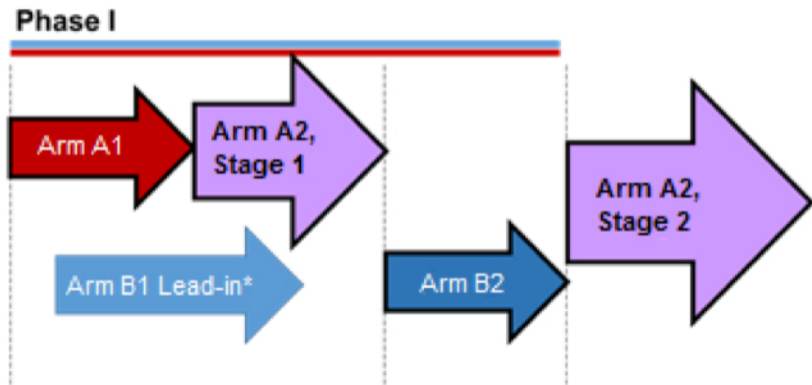

Supplement: 10780432ccr192586-sup-226887_2_supp_5864076_q03s07.pdf [file 10780432ccr192586-sup-226887_2_supp_5864076_q03s07.pdf]

**Supplemental Figure 4.**

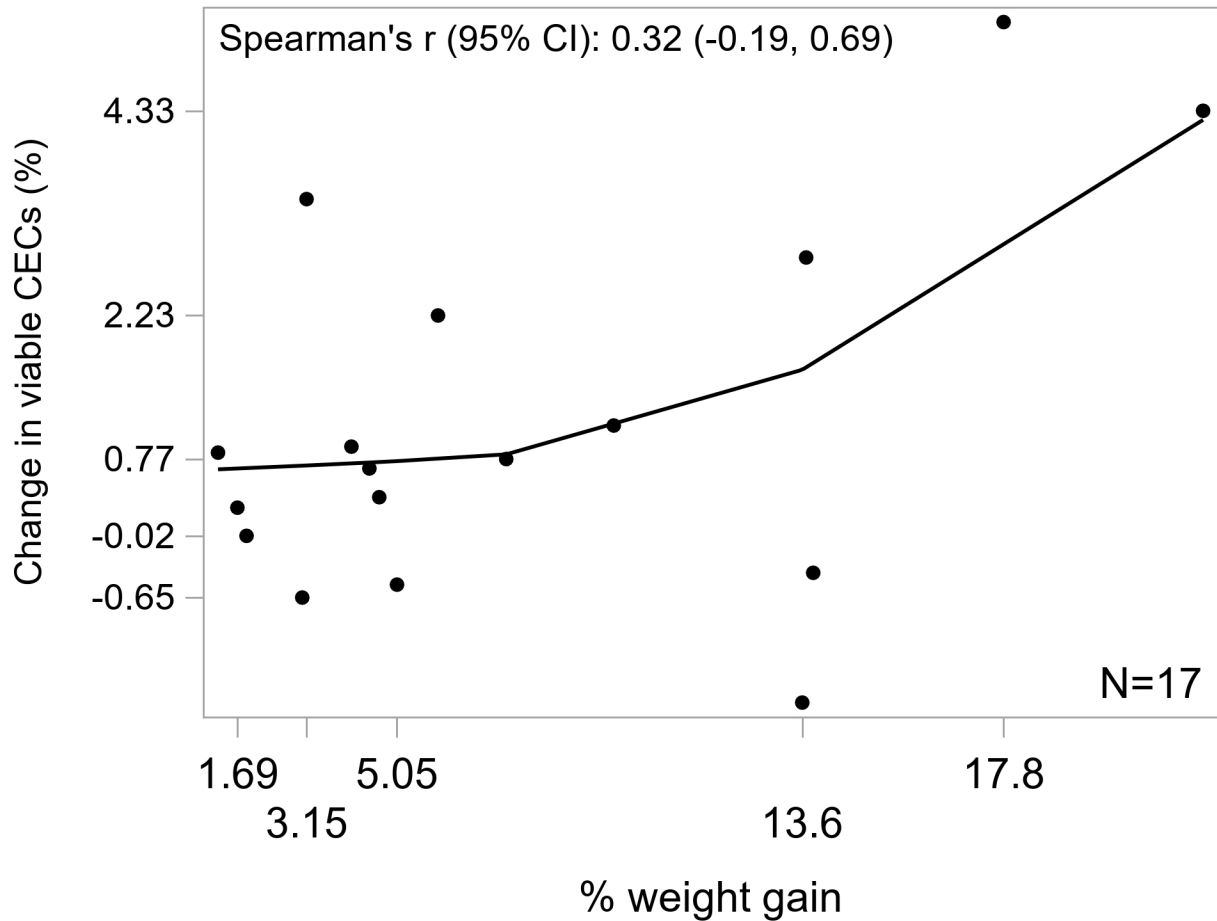

Supplement: 10780432ccr192586-sup-226887_2_supp_5911540_q18n5k.pdf [file 10780432ccr192586-sup-226887_2_supp_5911540_q18n5k.pdf]
